# Supplementary material for: Ru(iii) -based polyoxometalate tetramers as highly efficient heterogeneous catalysts for alcohol oxidation reactions at room temperature
Source: Royal Society of Chemistry journal article supplement (doi:10.1039/d1dt01819a), 2021-01-01
Supplement: d1dt01819a1.pdf [file d1dt01819a1.pdf]

## <Supporting Information>

### **Ru(III)-based polyoxometalate tetramer as highly efficient heterogeneous catalyst for alcohol oxidation reactions at room temperature**

Yan Zou, Huafeng Li, Xue Zhao, Junpeng Song, Yaqiong Wang, Pengtao Ma, Jingyang Niu\* and Jingping Wang\*

*Henan Key Laboratory of Polyoxometalate Chemistry, College of Chemistry and Chemical Engineering, Henan University, Kaifeng Henan 475004 (P.R. China)*

#### **Table of Contents**

**Fig. S1** The thermogravimetric curves of **1**.

**Fig. S2** Ball-and-stick representation of polyanion **1**.

**Fig. S3** (a) Ball-and-stick representation of the  $\{WO_6\}$  octahedron; (b) Ball-and-stick representation of the polyanion  $[(AsW_9O_{33})_4(WO_2)_4]^{28-}$  with the S2 sites.

**Fig. S4** Ball-and-stick representation of the polyanion of  $\{Ru_{1.6}(C_3H_3N_2)\}^{3.8+}$ , and the distance of  $Ru \cdots Ru$  is 5.945 Å.

**Fig. S5** (a) Combined polyhedral/Ball-and-stick representation of polyanion **1**; (b) Combined polyhedral/Ball-and-stick representation of  $[As_4W_{40}O_{140}\{Ru_2(CH_3COO)\}_2]^{28-}$ ; (c) Combined polyhedral/Ball-and-stick representation of  $[Pd_2Na_2K(AsW_9O_{33})_4(WO_2)_4(H_2O)]^{21-}$ .

**Fig. S6** The UV-Vis spectra of compound **1** with time intervals.

**Fig. S7** Catalyst **1** dissolved in water. (a) Zoom-in of the peaks at around  $m/z$  2166.67; (b) The simulated isotope pattern (bluish violet) and experimental data (black) at around  $m/z$  2166.67.

**Fig. S8** After catalysis **1** dissolved in water (a) ESI mass spectrum corresponding to the intact cluster at around 1511.38, 1766.60 and 2132.52; (b) Simulated (blue) and experimental (black) patterns at around  $m/z$  2132.52.

**Fig. S9** The  $^1H$ NMR spectrum of post-catalyzed solution.

**Table S1** Crystallographic data parameters for **1**.

**Table S2** Selected bonds distances of compound **1**.

**Table S3** Bond valence sum calculations of Ru, As and W of compound **1**.

**Table S4** Assignment of peaks in negative mode mass spectra of **1** before and after catalysis and simulation.

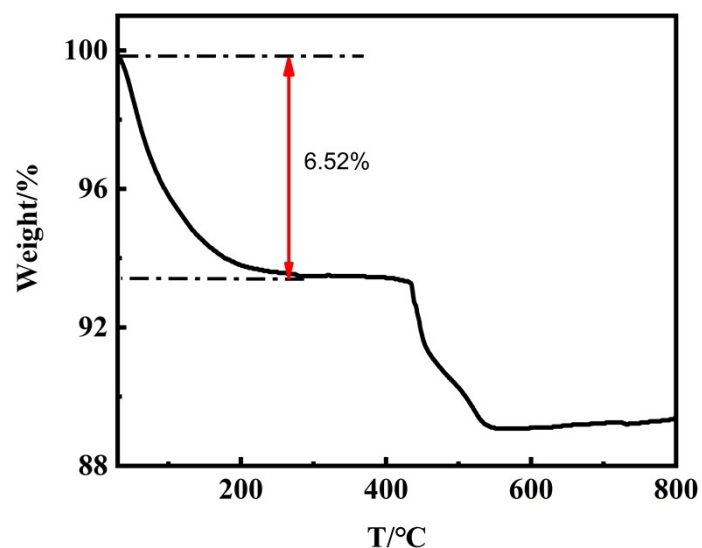

**Fig. S1** The thermogravimetric curves of **1**.

### TG analysis

The thermal stability of **1** has been explored under a nitrogen flow between room temperature and 800 °C by thermogravimetric analysis (TGA). The TGA curve reveals two-step weight loss process. The first weight loss of 6.52% from 30 to 240 °C is attributed to forty-two lattice water molecules (calc. 6.59%). The second weight loss corresponds to the partial collapse of POM skeleton and the oxidation of imidazole ligands.

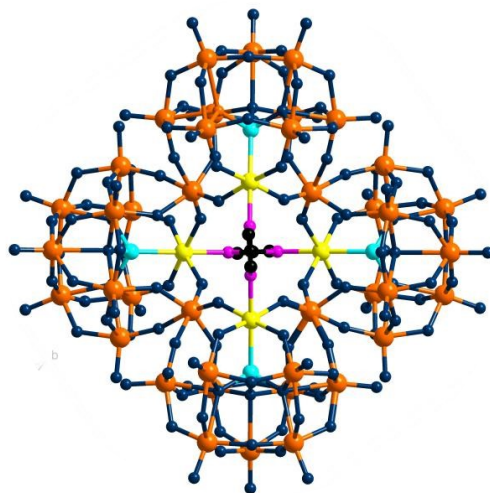

**Fig. S2** Ball-and-stick representation of polyanion **1**. Color code: Ru, yellow; As, aqua; O, dark blue; C, black; N, pink; all hydrogen atoms have been omitted for clarity.

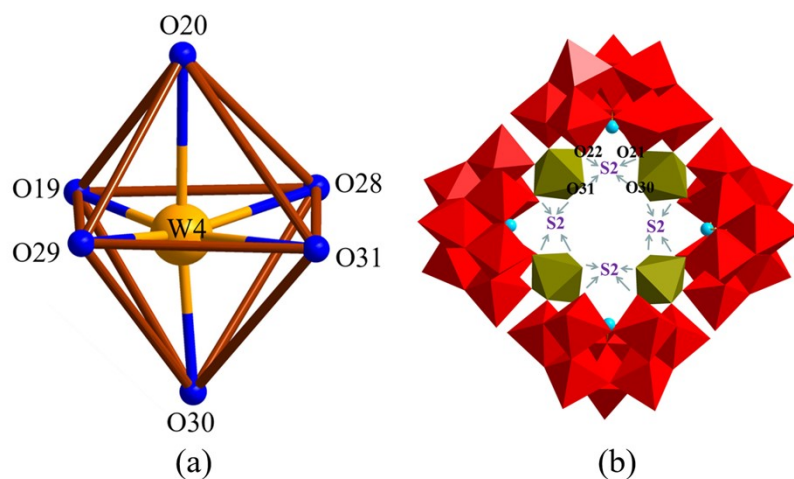

**Fig. S3** (a) Ball-and-stick representation of the  $\{WO_6\}$  octahedron. Color code: W, light orange; O, blue; (b) Ball-and-stick representation of the polyanion  $[(AsW_9O_{33})_4(WO_2)_4]^{28-}$  with the S2 sites. S2 means the remaining vacant site. Color code:  $WO_6$  octahedron, red; bridging group  $WO_6$  octahedron, dark yellow; As, aqua; O, dark blue; all hydrogen atoms have been omitted for clarity.

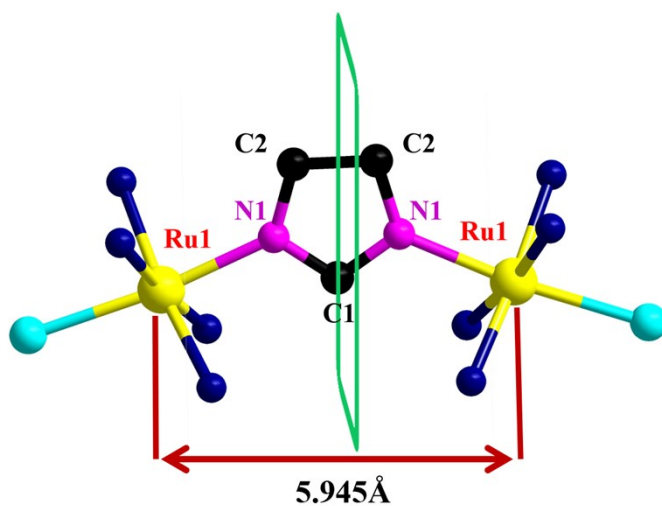

**Fig. S4** Ball-and-stick representation of the polyanion of  $\{Ru_{1.6}(C_3H_3N_2)\}^{3.8+}$ , and the distance of  $Ru \cdots Ru$  is 5.945 Å. Color code: Ru, yellow; As, aqua; O, dark blue; C, black; N, pink; all hydrogen atoms have been omitted for clarity.

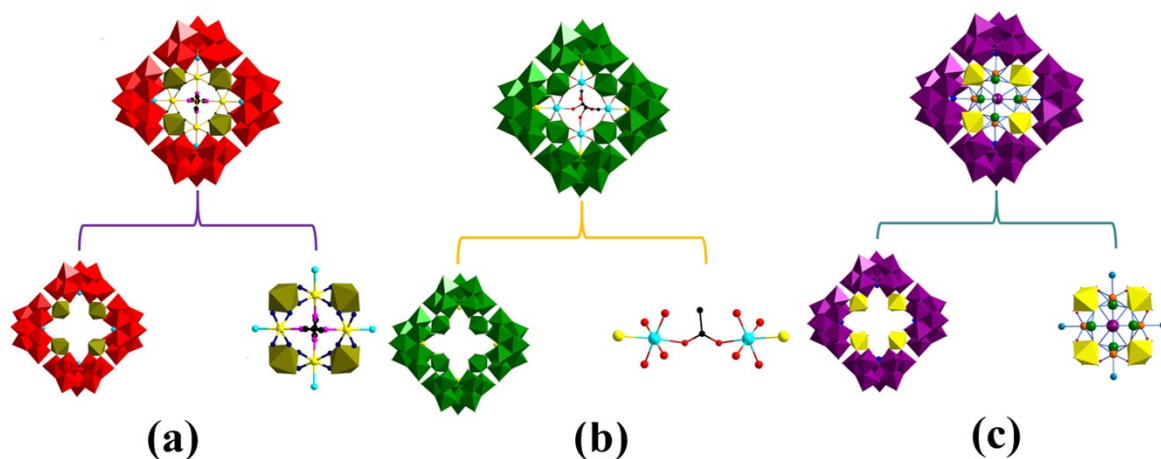

**Fig. S5** (a) Combined polyhedral/Ball-and-stick representation of polyanion **1**. Color code:  $\text{WO}_6$  octahedron, red; bridging group  $\text{WO}_6$  octahedron, dark yellow; Ru, yellow; As, aqua; O, dark blue; C, black; N, pink; all hydrogen atoms have been omitted for clarity; (b) Combined polyhedral/Ball-and-stick representation of  $[\text{As}_4\text{W}_{40}\text{O}_{140}\{\text{Ru}_2(\text{CH}_3\text{COO})\}_2]^{28-}$ . Color code:  $\text{WO}_6$  octahedron, green; As, yellow; Ru, aqua; C, black; O, red; (c) Combined polyhedral/Ball-and-stick representation of  $[\text{Pd}_2\text{Na}_2\text{K}(\text{AsW}_9\text{O}_{33})_4(\text{WO}_2)_4(\text{H}_2\text{O})]^{21-}$ . Color code:  $\text{WO}_6$  octahedron, violet; bridging group  $\text{WO}_6$  octahedron, yellow; K, violet; Na, green; Pd, orange; As, blue; O, red.

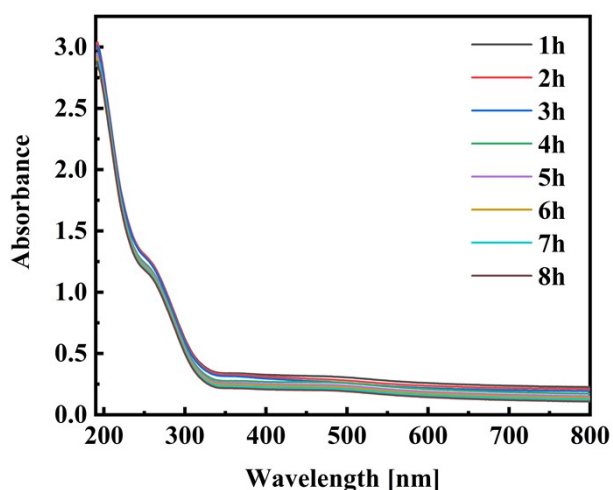

**Fig. S6** The UV-Vis spectra of compound **1** with time intervals.

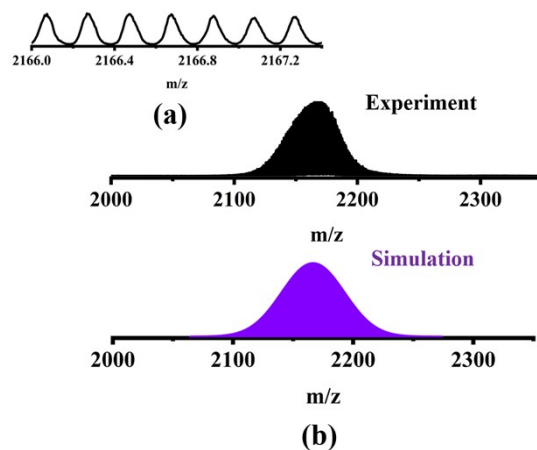

**Fig S7** Catalyst **1** dissolved in water: (a) Zoom-in of the peaks at around  $m/z$  2166.67; (b) The simulated isotope pattern (bluish violet) and experimental data (black) at around  $m/z$  2166.67.

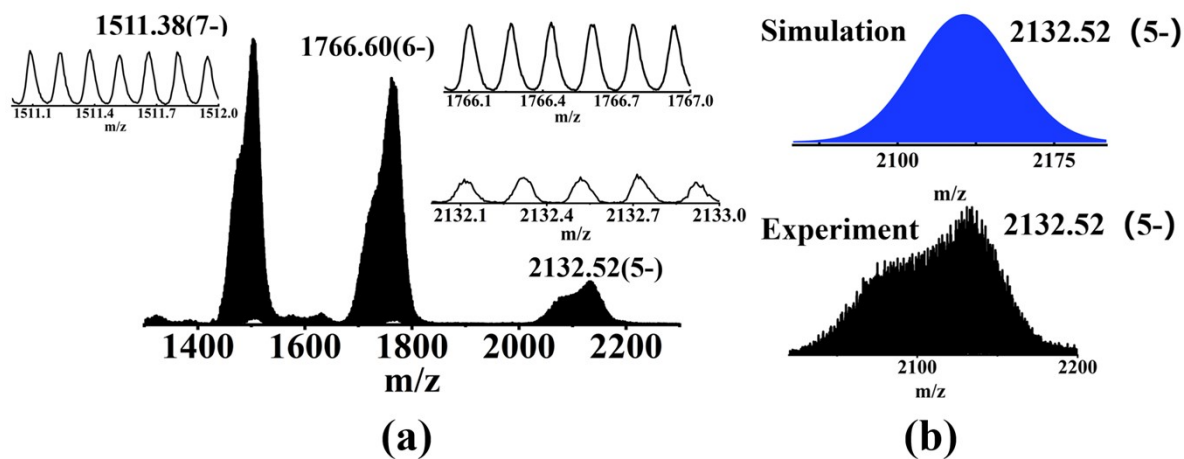

**Fig. S8** After catalysis **1** dissolved in water (a) ESI mass spectrum corresponding to the intact cluster at around 1511.38, 1766.60 and 2132.52; (b) Simulated (blue) and experimental (black) patterns at around  $m/z$  2132.52.

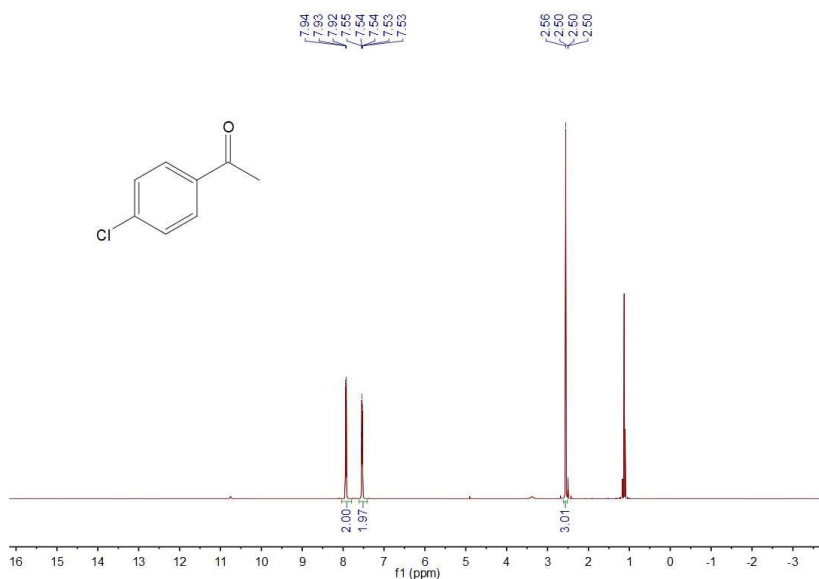

**Table S1** Crystallographic data parameters for **1**.

| <b>1</b>                                                                             |                                                                                                                                                |
|--------------------------------------------------------------------------------------|------------------------------------------------------------------------------------------------------------------------------------------------|
| empirical formula                                                                    | C <sub>6</sub> H <sub>6</sub> As <sub>4</sub> K <sub>4</sub> N <sub>4</sub> Na <sub>9</sub> O <sub>158</sub> Ru <sub>3.2</sub> W <sub>40</sub> |
| formula weight                                                                       | 11004.08                                                                                                                                       |
| temperature (K)                                                                      | 150.0                                                                                                                                          |
| crystal system                                                                       | tetragonal                                                                                                                                     |
| space group                                                                          | I-4                                                                                                                                            |
| <i>a</i> /Å                                                                          | 19.7922(4)                                                                                                                                     |
| <i>b</i> /Å                                                                          | 19.7922(4)                                                                                                                                     |
| <i>c</i> /Å                                                                          | 26.1324(6)                                                                                                                                     |
| $\alpha$ /deg                                                                        | 90                                                                                                                                             |
| $\beta$ /deg                                                                         | 90                                                                                                                                             |
| $\gamma$ /deg                                                                        | 90                                                                                                                                             |
| <i>V</i> /Å <sup>3</sup>                                                             | 10236.9(5)                                                                                                                                     |
| <i>Z</i>                                                                             | 2                                                                                                                                              |
| $\rho_{\text{calc}}$ /g cm <sup>-3</sup>                                             | 3.570                                                                                                                                          |
| $\mu$ /mm <sup>-1</sup>                                                              | 23.427                                                                                                                                         |
| 2 $\theta$ range/deg                                                                 | 4.858 to 56.612                                                                                                                                |
| index ranges                                                                         | -24 ≤ <i>h</i> ≤ 26<br>-22 ≤ <i>k</i> ≤ 26<br>-34 ≤ <i>l</i> ≤ 34                                                                              |
| reflns collected                                                                     | 41367                                                                                                                                          |
| independent reflns                                                                   | 12357                                                                                                                                          |
| <i>R</i> <sub>int</sub>                                                              | 0.0612                                                                                                                                         |
| data/restraints/parameters                                                           | 12357/198/519                                                                                                                                  |
| GOF on <i>F</i> <sup>2</sup>                                                         | 1.079                                                                                                                                          |
| <i>R</i> <sub>1</sub> , <i>wR</i> <sub>2</sub> [ <i>I</i> > 2 $\sigma$ ( <i>I</i> )] | 0.0409, 0.0946                                                                                                                                 |
| <i>R</i> <sub>1</sub> , <i>wR</i> <sub>2</sub> [all data]                            | 0.0441, 0.0959                                                                                                                                 |

$$R_1 = \sum ||F_o| - |F_c|| / \sum |F_o|, \quad wR_2 = \{\sum [w(F_o^2 - F_c^2)^2] / \sum [w(F_o^2)^2]\}^{1/2}$$

**Table S2** Selected bonds distances of compound **1**.

| Bond    | Bond length | Bond   | Bond length |
|---------|-------------|--------|-------------|
| Ru1–O21 | 2.072 (13)  | W4–O19 | 2.097 (12)  |
| Ru1–O22 | 2.071 (14)  | W4–O20 | 2.067 (13)  |
| Ru1–O30 | 2.031 (13)  | W4–O28 | 1.977 (14)  |
| Ru1–O31 | 2.049 (13)  | W4–O29 | 1.907 (13)  |
| Ru1–As1 | 2.394 (3)   | W4–O30 | 1.767 (15)  |
| Ru–N1   | 2.07 (2)    | W4–O31 | 1.721 (13)  |

**Table S3** Bond valence sum calculations of Ru, As and W of compound **1**.

| Atom Code       | Bond Valence | Valence State | Atom Code | Bond Valence | Valence State |
|-----------------|--------------|---------------|-----------|--------------|---------------|
| Ru1/Ru2/Ru3/Ru4 | 3.271        | +3            | W5        | 6.199        | +6            |
| As1/As2/As3/As4 | 2.297        | +3            | W6        | 6.102        | +6            |
| W1              | 6.351        | +6            | W7        | 6.123        | +6            |
| W2              | 5.774        | +6            | W8        | 6.259        | +6            |
| W3              | 6.411        | +6            | W9        | 6.481        | +6            |
| W4              | 6.358        | +6            | W10       | 5.960        | +6            |

**Table S4** Assignment of peaks in negative mode mass spectra of **1** before and after catalysis and simulation.

| Entry | Charge | Observed<br>M/z | Calculated<br>M/z | Polyanion                                                                                                                                                              |
|-------|--------|-----------------|-------------------|------------------------------------------------------------------------------------------------------------------------------------------------------------------------|
| 1     | -7     | 1513.23         | 1513.19           | $\text{KNa}_7\text{H}_{5.4}[(\text{AsW}_9\text{O}_{33})_4(\text{WO}_2)_4\{\text{Ru}_{3.2}(\text{C}_3\text{H}_3\text{N}_2)_2\}(\text{H}_2\text{O})_2]^{7-}$             |
| 2     | -6     | 1782.90         | 1782.93           | $\text{K}_3\text{Na}_5\text{H}_{6.4}[(\text{AsW}_9\text{O}_{33})_4(\text{WO}_2)_4\{\text{Ru}_{3.2}(\text{C}_3\text{H}_3\text{N}_2)_2\}(\text{H}_2\text{O})_6]^{6-}$    |
| 3     | -5     | 2166.67         | 2166.53           | $\text{K}_3\text{Na}_7\text{H}_{5.4}[(\text{AsW}_9\text{O}_{33})_4(\text{WO}_2)_4\{\text{Ru}_{3.2}(\text{C}_3\text{H}_3\text{N}_2)_2\}(\text{H}_2\text{O})_{11}]^{5-}$ |
| 4     | -7     | 1511.38         | 1511.45           | $\text{Na}_9\text{H}_{4.4}[(\text{AsW}_9\text{O}_{33})_4(\text{WO}_2)_4\{\text{Ru}_{3.2}(\text{C}_3\text{H}_3\text{N}_2)_2\}(\text{H}_2\text{O})]^{7-}$                |
| 5     | -6     | 1766.60         | 1766.53           | $\text{Na}_9\text{H}_{5.4}[(\text{AsW}_9\text{O}_{33})_4(\text{WO}_2)_4\{\text{Ru}_{3.2}(\text{C}_3\text{H}_3\text{N}_2)_2\}(\text{H}_2\text{O})_2]^{6-}$              |
| 6     | -5     | 2132.52         | 2132.52           | $\text{K}_3\text{Na}_5\text{H}_{7.4}[(\text{AsW}_9\text{O}_{33})_4(\text{WO}_2)_4\{\text{Ru}_{3.2}(\text{C}_3\text{H}_3\text{N}_2)_2\}(\text{H}_2\text{O})_4]^{5-}$    |
